CORRECTION

# Correction: How Prevalent Is Schizophrenia?

The *PLOS Medicine* Staff

## Notice of Republication

This article was republished on August 15, 2019, to remove the article figure and its accompanying legend from publication by request of the original artist due to a change in copyright.

## Reference

1. How Prevalent Is Schizophrenia? PLoS Med. 2005; 2(5): e146. <https://doi.org/10.1371/journal.pmed.0020146>

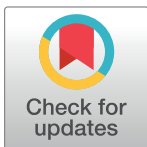

## OPEN ACCESS

**Citation:** The *PLOS Medicine* Staff (2019) Correction: How Prevalent Is Schizophrenia? PLoS Med 16(8): e1002925. <https://doi.org/10.1371/journal.pmed.1002925>

**Published:** August 30, 2019

**Copyright:** © 2019 The PLOS Medicine Staff. This is an open access article distributed under the terms of the [Creative Commons Attribution License](https://creativecommons.org/licenses/by/4.0/), which permits unrestricted use, distribution, and reproduction in any medium, provided the original author and source are credited.
